# Supplementary material for: Surface characterization and methane activation on SnOx/Cu2O/Cu(111) inverse oxide/metal catalysts
Source: Royal Society of Chemistry journal article supplement (doi:10.1039/d1cp02829d), 2021-01-01
Supplement: d1cp02829d1.pdf [file d1cp02829d1.pdf]

## Electronic Supplementary Information

### Surface Characterization and Methane activation on a $\text{SnO}_x/\text{Cu}_2\text{O}/\text{Cu}(111)$ Inverse Oxide/Metal Catalysts

Jindong Kang,<sup>†a</sup> Ning Rui,<sup>†b</sup> Erwei Huang,<sup>†a</sup> Yi Tian,<sup>a</sup> Mausumi Mahapatra,<sup>b</sup> Rina Rosales,<sup>a</sup> Ivan Orozco,<sup>a</sup> Rui Shi,<sup>a</sup> Sanjaya D. Senanayake,<sup>b</sup> Ping Liu,<sup>a,b</sup> and José A. Rodríguez<sup>\*a,b</sup>

a. Department of Chemistry, SUNY at Stony Brook, Stony Brook, NY, 11794 USA.

b. Chemistry Department, Brookhaven National Laboratory, Upton, NY, 11973 USA

<sup>†</sup> All these authors contributed in equal terms to this research.

\* Corresponding author, E-mail: rodriguez@bnl.gov

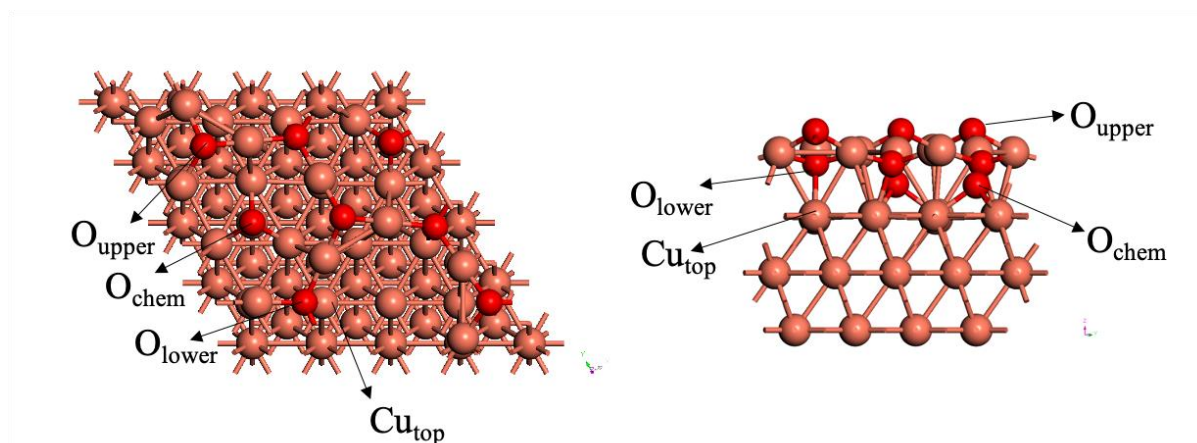

**Fig. S1** Top (left) and side (right) view of  $\text{Cu}_m\text{O}/\text{Cu}(111)$  DFT model; Cu: brown; O: red.

**Notes:** The DFT-optimized atomic structure of  $\text{Cu}_m\text{O}/\text{Cu}(111)$  ( $m \approx 1.13$ ) is shown in Figure. S1. Specifically, the  $\text{Cu}(111)$ -supported  $\text{Cu}_{1.13}\text{O}$  includes three types of oxygen species depending on their unique location,  $\text{O}_{\text{chem}}$ ,  $\text{O}_{\text{upper}}$  and  $\text{O}_{\text{lower}}$  atoms, where both  $\text{O}_{\text{chem}}$  and  $\text{O}_{\text{lower}}$  bind with bottom  $\text{Cu}(111)$  surface directly. By including these directly bound Cu sites from  $\text{Cu}(111)$ , the  $\text{Cu}_m\text{O}$  layer can reach to  $\text{Cu}_2\text{O}$ . Our previous studies have shown that such model system described well the 44 structure as observed (Ref. S1, Ref. S2). The 44 structure was observed on exposing  $\text{Cu}(111)$  to oxidizing atmosphere. It is a  $\text{Cu}(111)$ -supported  $\text{Cu}_x\text{O}$  layer, which is different from  $\text{Cu}_2\text{O}(111)$  in term of atomic arrangement and chemical activity (Ref. S1).

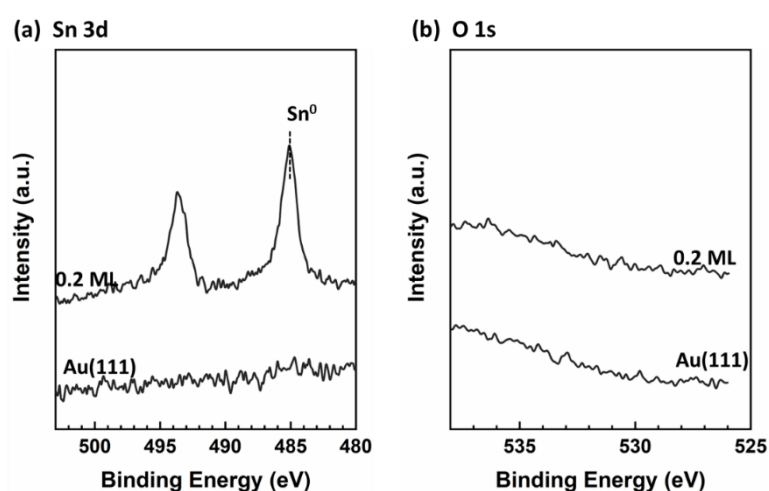

**Fig. S2** (a) Sn 3d and (b) O 1s XPS spectra of pristine  $\text{Au}(111)$  and  $\text{Sn}/\text{Au}(111)$  surfaces. Coverage is estimated to be 0.2 ML. Sn was vapor deposited on the  $\text{Au}(111)$  surface under a background pressure of  $5 \times 10^{-7}$  torr of oxygen at 450 K.

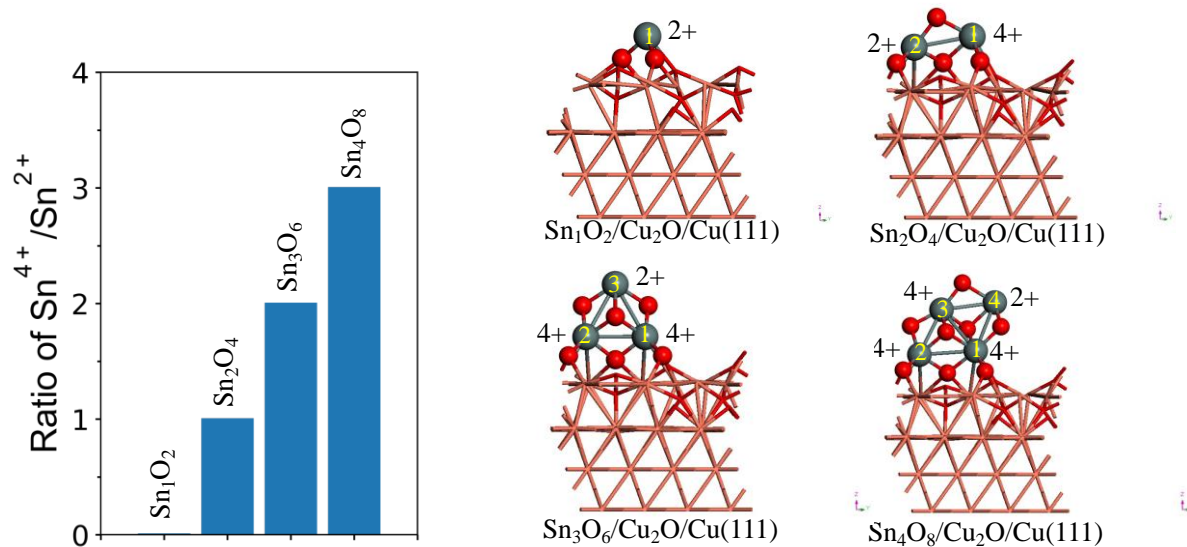

**Fig. S3** (left) Distribution for  $\text{Sn}^{4+}/\text{Sn}^{2+}$  ratios of  $\text{Sn}_x\text{O}_y$  clusters supported by  $\text{Cu}_2\text{O}/\text{Cu}(111)$  based on Bader charge analysis; (right) Detailed distribution of  $\text{Sn}^{4+}$  and  $\text{Sn}^{2+}$  for  $\text{Sn}_x\text{O}_y/\text{Cu}_2\text{O}/\text{Cu}(111)$  models.

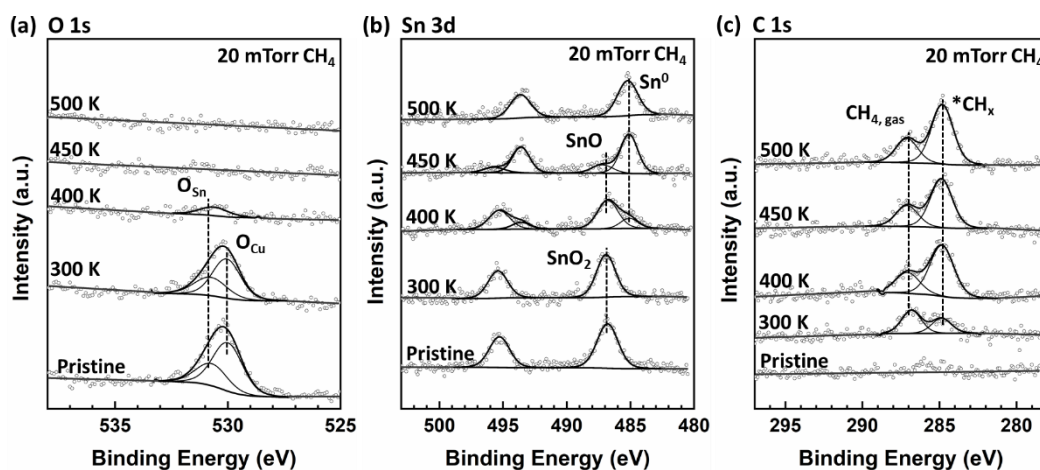

**Fig. S4** (a) O 1s, (b) Sn 3d and (c) C 1s regions in AP-XPS spectra for the  $\text{SnO}_2/\text{Cu}_2\text{O}/\text{Cu}(111)$  surface ( $\theta_{\text{SnO}_2} \sim 0.1$  ML) when exposed to 50 mTorr of  $\text{CH}_4$  at different temperatures.

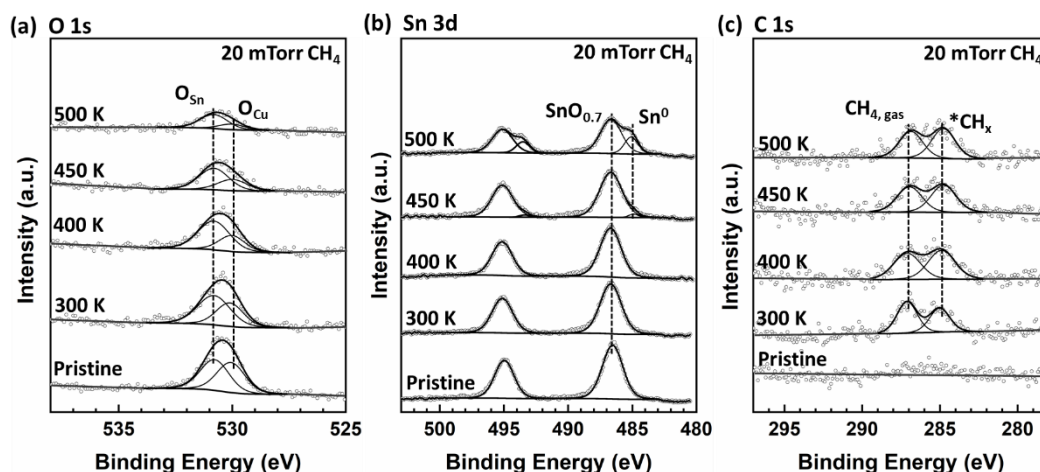

**Fig. S5** (a) O 1s, (b) Sn 3d, and (c) C 1s regions in AP-XPS spectra for the  $\text{SnO}_2/\text{Cu}_2\text{O}/\text{Cu}(111)$  surface ( $\theta_{\text{SnO}_2} \sim 0.6$  ML) when exposed to 50 mTorr of  $\text{CH}_4$  at different temperatures.

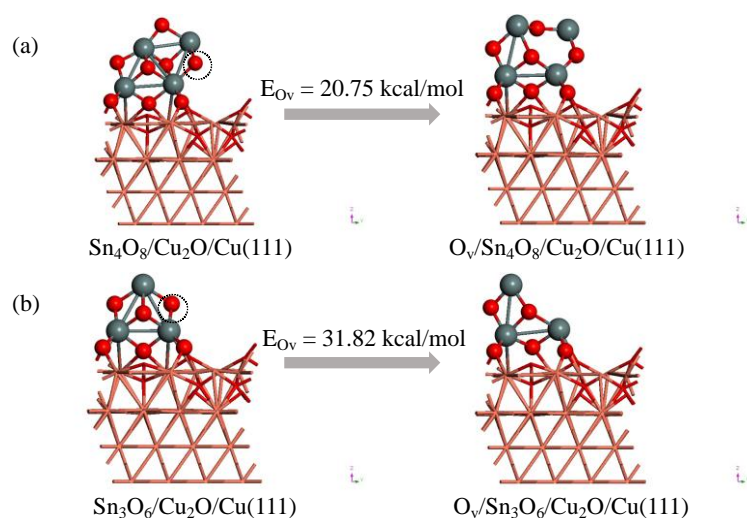

**Fig. S6** Oxygen vacancy ( $\text{O}_v$ ) formations on (a)  $\text{Sn}_4\text{O}_8/\text{Cu}_2\text{O}/\text{Cu}(111)$  and (b)  $\text{Sn}_3\text{O}_6/\text{Cu}_2\text{O}/\text{Cu}(111)$  models; The studied  $\text{Sn}^{4+}\text{-O-Sn}^{2+}$  bridge O was indicated by the dashed circle.

## References:

S1 W. An, A. E. Baber, F. Xu, M. Soldemo, J. Weissenrieder, D. Stacchiola, P. Liu, *ChemCatChem* **2014**, 6, 2364-2372.

S2 W. An, F. Xu, D. Stacchiola, P. Liu, *Chemcatchem* **2015**, 7, 3865-3872.
